# Supplementary material for: Dynamic sub-wavelength microparticle patterning via phase-modulated pulsing coherent surface acoustic wave tweezers
Source: Royal Society of Chemistry journal article supplement (doi:10.1039/d5lc00140d), 2025-01-01
Supplement: d5lc00140d1.pdf [file d5lc00140d1.pdf]

## Electronic Supplementary Information

### Dynamic Sub-Wavelength Microparticle Patterning via Phase-Modulated Pulsing Coherent Surface Acoustic Wave Tweezers

Xin Li<sup>a,b</sup>, Deqing Mei<sup>b</sup>, Hemin Pan<sup>b</sup>, Zhuzheng Qian<sup>b</sup>, Yancheng Wang<sup>a,b\*</sup>

<sup>a</sup> State Key Laboratory of Fluid Power and Mechatronic Systems, School of Mechanical Engineering, Zhejiang University, Hangzhou 310058, China

<sup>b</sup> Zhejiang Key Laboratory of Advanced Equipment Manufacturing and Measurement Technology, School of Mechanical Engineering, Zhejiang University, Hangzhou 310058, China

\*Corresponding author: Yancheng Wang

E-mail: yanchwang@zju.edu.cn; Tel.: (+86) 571-87951906; Fax: (+86) 571-87951145

#### Section 1. The reflection coefficient of the chamber ceiling with different interlay material

**Table S1.** Material properties at  $T = 25\text{ }^{\circ}\text{C}$  used in theoretical calculation.

#### Supplementary Figures.

**Fig. S1.** Time average acoustic pressure fields under phase-modulated pulsing coherent SAWs with PDMS chamber ceiling.

**Fig. S2.** Fabrication processes of the chamber and ceiling with glass interlayer.

**Fig. S3.** Simulation results of half-spacing particle patterning.

**Fig. S4.** Schematic diagram of the single period excitation signals on opposing IDTs.

**Fig. S5.** Patterning results of half-spacing uneven particle patterning.

#### Supplementary Movies.

**Movie S1.** Particle patterning with SSAWS under the chamber ceiling with glass interlayer.

**Movie S2.** Half spacing particle patterning with phase modulated pulsed saws along  $x$ -direction under the glass interlayer ceiling of PDMS chamber.

**Movie S3.** One-third spacing particle patterning with phase-modulated pulsed saws along  $x$ -direction under the glass interlayer ceiling of the PDMS chamber.

## Section 1. The reflection coefficient of the chamber ceiling with different interlay material

For nonmaterial chamber ceiling conditions, the reflection coefficient is given by

$$R_{water-PDMS} = \frac{Z_{PDMS} - Z_{water}}{Z_{PDMS} + Z_{water}} = -0.1855 \quad (S1)$$

where the material's acoustic impedance is  $Z = \rho c$  for single material reflection,  $\rho$  and  $c$  are the density and acoustic velocity of the material respectively, which are listed in Table. S1. The reflected acoustic energy is  $R^2$  times of input energy.

For multi-material chamber ceiling conditions, the reflection coefficient is given by <sup>s1</sup>

$$Z_n = z_1 \frac{Z_{n+1} - iz_{n+1} \tan(k_{n+1}d_{n+1})}{z_{n+1} - iZ_{n+1} \tan(k_{n+1}d_{n+1})} \quad (S2)$$

$$R_n = \frac{Z_n - z_n}{Z_n + z_n} \quad (S3)$$

where  $Z$  and  $d$  are the impedance and thickness of each layer, the wave number  $k_n = \omega_n / c_n$ , the first boundary between the liquid and LiNbO<sub>3</sub> base is set as the  $R_0$ .

**Table S1.** Material properties at  $T = 25$  °C used in theoretical calculations <sup>s2</sup>

| Material | Acoustic Velocity<br>m/s | Density<br>kg/m <sup>3</sup> | Acoustic<br>Impedance Pa·s/m | Reflection Coefficient<br>as Interlay Material R |
|----------|--------------------------|------------------------------|------------------------------|--------------------------------------------------|
| Water    | 1490                     | 960                          | 1.430                        | \                                                |
| PDMS     | 1075                     | 970                          | 1.043                        | -0.1855                                          |
| PMMA     | 2547                     | 1190                         | 3.031                        | 0.3434                                           |
| Glass    | 5845                     | 2203                         | 12.877                       | 0.7936                                           |

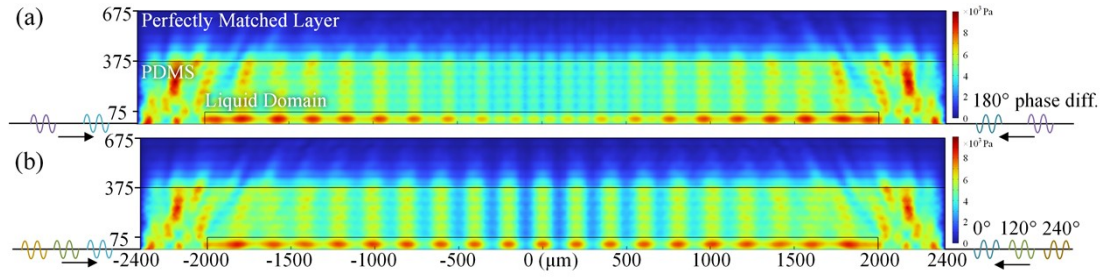

**FIG. S1** Time average acoustic pressure fields under phase-modulated pulsing coherent SAWs with PDMS chamber which are highly affected by the TSAWs patterning form. 20 sinusoidal cycles in a single pulse with the pulse duty cycle of 1. (a) Pulsed signal with  $180^\circ$  phase-increment in each pulsation; The generated acoustic pressure nearing the PDMS boundary is dominated by the TSAWs patterning forms, while at the centre of the liquid domain remains half spacing. (b) Pulsed signal with  $120^\circ$  phase-increment in each pulsation; The spacing of pressure node remains the same with SSAWs.

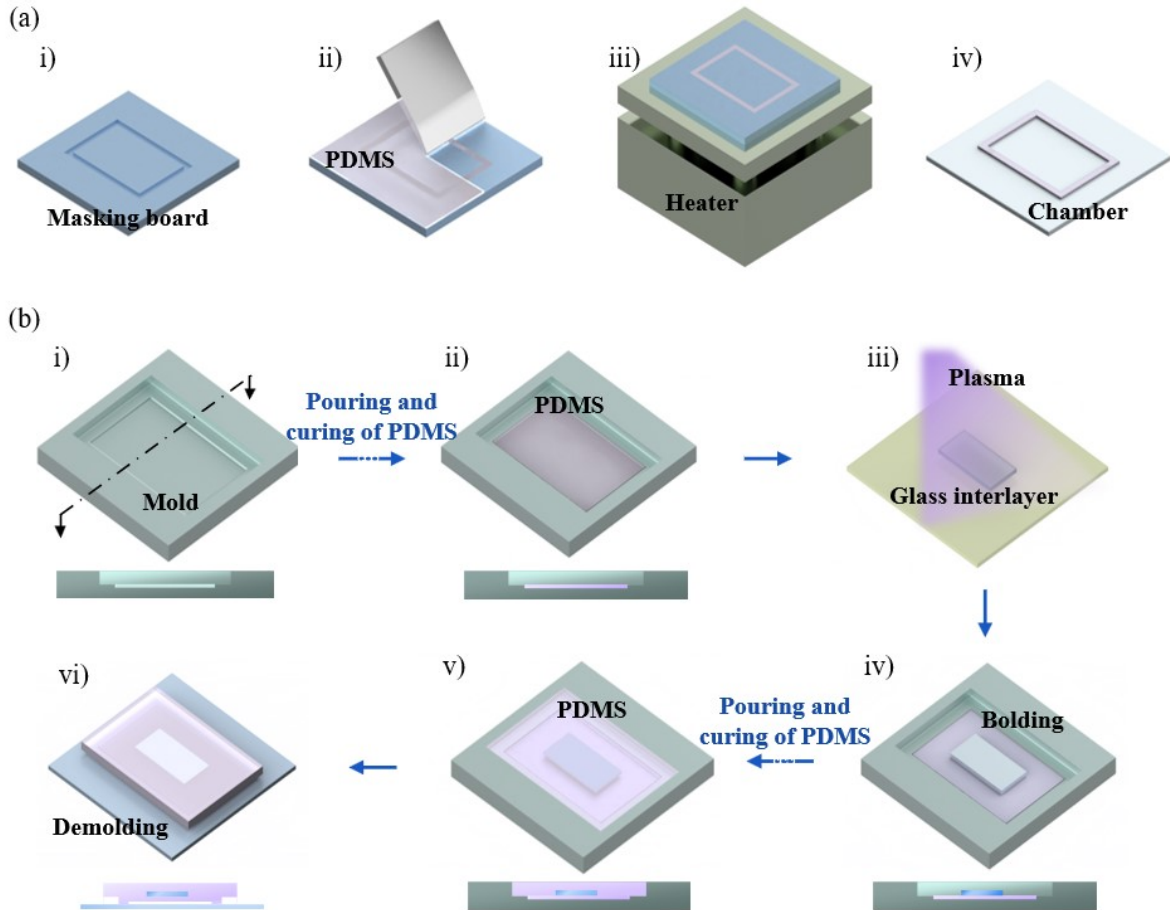

**FIG. S2** Fabrication processes of the chamber and ceiling with glass interlayer. (a) PDMS chamber: (i) chamber mask (ii) PDMS pouring; (iii) PDMS curing; (iv) the fabricated PDMS chamber. (b) ceiling with glass interlayer (i) ceiling mold with  $55\mu\text{m}$  bottom layer (ii) first PDMS layer after pouring and curing; (iii) plasma treatment of glass interlayer; (iv) glass interlayer bonded with the first PDMS layer; (v) second PDMS layer after pouring and curing; (vi) the fabricated ceiling.

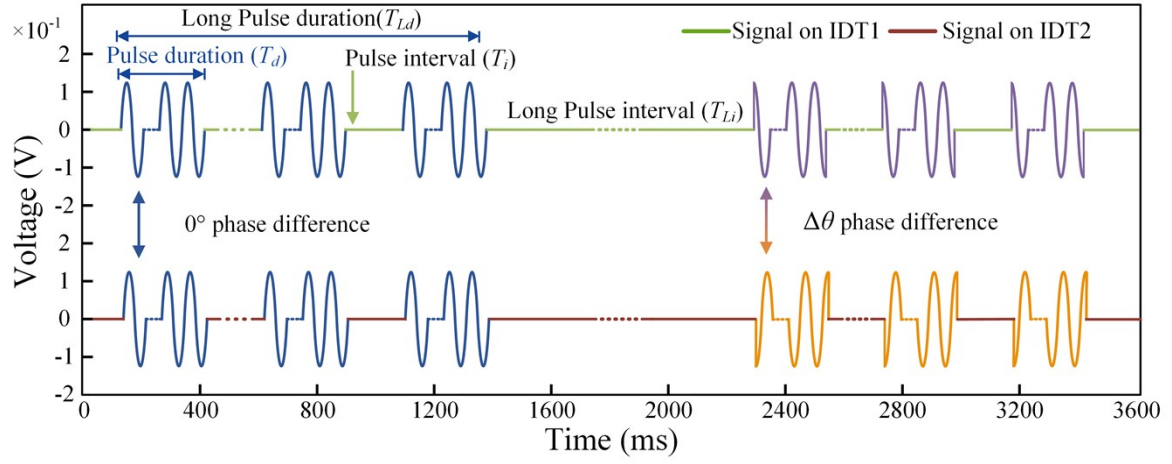

**FIG. S3** Schematic diagram of the single period excitation signals on opposing IDTs with 100  $\mu\text{m}$  finger width.

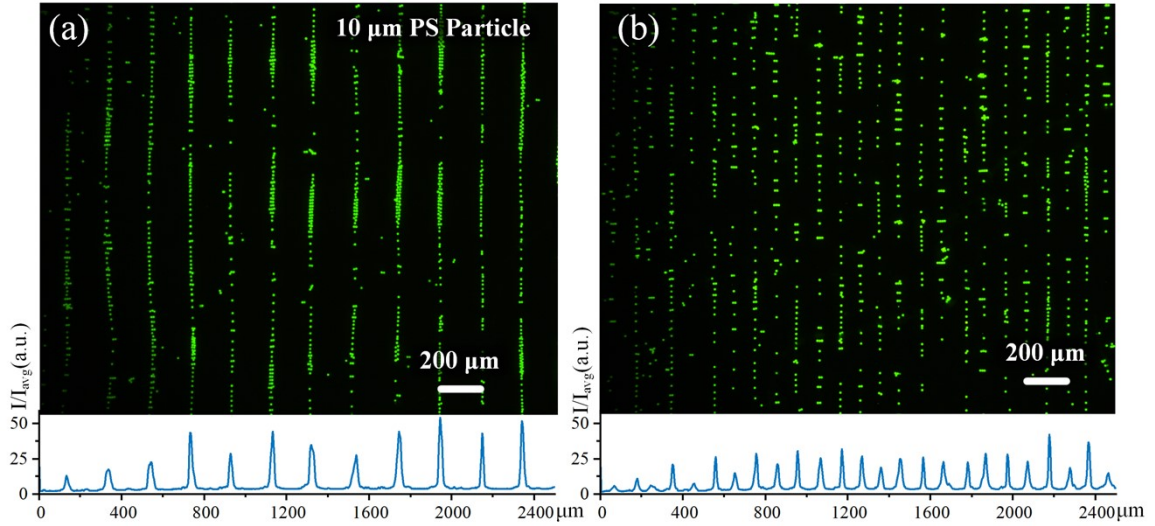

**FIG. S4** Patterning results of half-spacing particle patterning under phase modulated pulsing coherent SAWs with  $0^\circ$  and  $180^\circ$  phase difference and 400  $\mu\text{m}$  wavelength under glass interlayer. The fluorescence intensity averaged across the height of the frame is followed below. (a) PS particles patterned under conventional SSAWs with average peak-to-peak distances of 200.6  $\mu\text{m}$ . (b) half-spacing patterning with average peak-to-peak distances of 99.8  $\mu\text{m}$ .

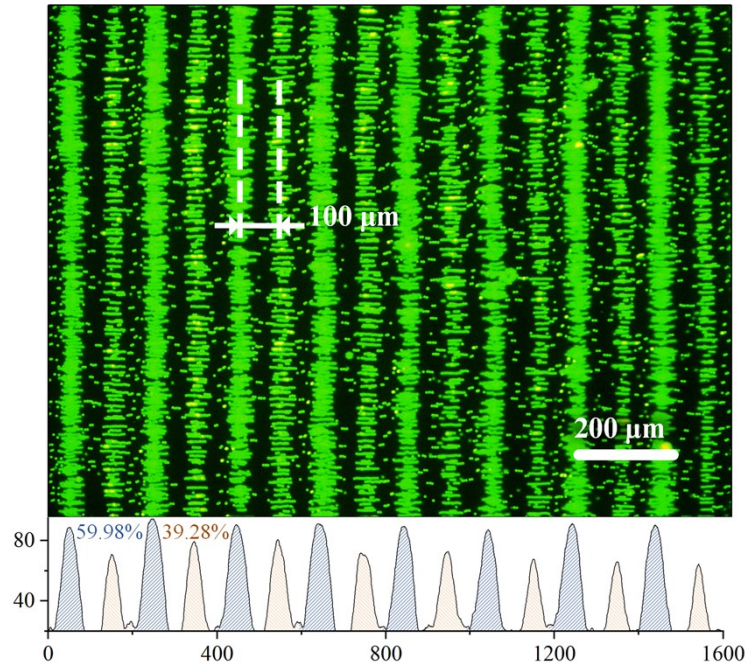

**FIG. S5** Patterning results of half-spacing uneven particle patterning under phase modulated pulsing coherent SAWs with  $0^\circ$  and  $180^\circ$  phase difference and  $400\ \mu\text{m}$  wavelength under glass interlayer. The fluorescence intensity averaged across the height of the frame is followed below. The areas under the odd and even peaks are 59.98% and 39.28% of the total area, respectively, indicating that the area under the odd peaks is 52.70% greater than that under the even peaks.

## Reference

- S1. I. P. Dunn and W. A. Davern, *Applied Acoustics*, 1986, **19**, 321-334.
- S2. S. Sachs, M. Baloochi, C. Cierpka and J. König, *Lab Chip*, 2022, **22**, 2011-2027.
